# Supplementary material for: Enantiopure chiroptical probes for circular dichroism and absorbance based detection of nerve gas simulants
Source: Royal Society of Chemistry journal article supplement (doi:10.1039/d2cc03392e), 2022-01-01
Supplement: d2cc03392e1.pdf [file d2cc03392e1.pdf]

X-ray crystallographic data of H<sub>3</sub>L<sub>1</sub> (data up to 50°)

| Parameters                                                                           | H <sub>3</sub> L <sub>1</sub> 50 deg                           |
|--------------------------------------------------------------------------------------|----------------------------------------------------------------|
| Molecular formula                                                                    | C <sub>63</sub> H <sub>89</sub> N <sub>3</sub> O <sub>10</sub> |
| Formula weight                                                                       | 1048.37                                                        |
| Temperature (K)                                                                      | 298(2)                                                         |
| Crystal system                                                                       | monoclinic                                                     |
| Space group                                                                          | P2 <sub>1</sub>                                                |
| Crystal colour                                                                       | Colourless                                                     |
| a (Å)                                                                                | 10.9618(8)                                                     |
| b (Å)                                                                                | 21.0542(14)                                                    |
| c (Å)                                                                                | 14.0676(9)                                                     |
| α (°)                                                                                | 90                                                             |
| β (°)                                                                                | 111.390(2)                                                     |
| γ (°)                                                                                | 90                                                             |
| Volume (Å <sup>3</sup> )                                                             | 3023.1(4)                                                      |
| Z                                                                                    | 2                                                              |
| Density (g/cm <sup>3</sup> )                                                         | 1.152                                                          |
| μ mm <sup>-1</sup>                                                                   | 0.077                                                          |
| F(000)                                                                               | 1136                                                           |
| Crystal size (mm <sup>3</sup> )                                                      | 0.34 × 0.18 × 0.05                                             |
| 2θ range for data collection                                                         | 3.87 to 50                                                     |
| Reflections collected                                                                | 53139                                                          |
| Independent reflections                                                              | 10608                                                          |
| R <sub>int</sub>                                                                     | 0.0870                                                         |
| R <sub>sigma</sub>                                                                   | 0.0665                                                         |
| Data/restraints/parameters                                                           | 10608/2/720                                                    |
| Goodness of fit on F <sup>2</sup>                                                    | 1.056                                                          |
| R1(F <sub>0</sub> ),<br>wR2(F <sub>0</sub> )<br>(I ≥ 2 σ(I))                         | 0.0512<br>0.1119                                               |
| R1(F <sub>0</sub> <sup>2</sup> ),<br>wR2(F <sub>0</sub> <sup>2</sup> )<br>(all data) | 0.0926<br>0.1356                                               |
| Largest diffraction<br>peak/hole / e Å <sup>-3</sup>                                 | 0.20/-0.23                                                     |
| CCDC No.                                                                             | 2179411                                                        |
